# Supplementary material for: Effect of Parental Counseling on Infants’ Healthy Sleep Habits in Brazil: A Randomized Clinical Trial
Source: PubMed Central journal article supplement (PMC6991232; doi:10.1001/jamanetworkopen.2019.18062), 2019-12-20
Supplement: jamanetwopen-2-e1918062-s003.pdf [file jamanetwopen-2-e1918062-s003.pdf]

## Data Sharing Statement

### Data

**Data available:** Yes

**Data types:** Deidentified participant data, Data dictionary

**How to access data:** Proposals should be directed to [cpublicacoes.coortespelotas@gmail.com](mailto:cpublicacoes.coortespelotas@gmail.com).

**When available:** With publication

### Supporting Documents

**Document types:** None

### Additional Information

**Who can access the data:** To get access, data requestors will need to sign a data access agreement.

**Types of analyses:** Data will be made available for any purpose.

**Mechanisms of data availability:** Data will be made available with investigator support after approval of a proposal and signature of data access agreement.
